# Supplementary material
Source: PubMed Central journal article supplement (PMC3812427)
Supplement: NIHMS517714-supplement-01.pdf [file NIHMS517714-supplement-01.pdf]

## SUPPLEMENTARY REFERENCES

1. Laskowski, R. A., Rullmann, J. A. C., MacArthur, M. W., Kaptein, R. & Thornton, J. M. (1996). AQUA and PROCHECK-NMR: Programs for checking the quality of protein structures solved by NMR. *J. Biomol. NMR* **8**, 477-486.
2. Vriend, G. (1990). What If - a Molecular Modeling and Drug Design Program. *J. Mol. Graphics* **8**, 52-56.
3. Hekkelman, M. L., Te Beek, T. A., Pettifer, S. R., Thorne, D., Attwood, T. K. & Vriend, G. (2010). WIWS: a protein structure bioinformatics Web service collection. *NAR* **38**, W719-723.
4. Berjanskii, M., Zhou, J. J., Liang, Y. J., Lin, G. H. & Wishart, D. S. (2012). Resolution-by-proxy: a simple measure for assessing and comparing the overall quality of NMR protein structures. *J. Biomol. NMR* **53**, 167-180.
5. Bhattacharya, A., Tejero, R. & Montelione, G. T. (2007). Evaluating protein structures determined by structural genomics consortia. *Proteins: Struct., Funct., Bioinf.* **66**, 778-795.
6. Laskowski, R. A., MacArthur, M. W., Moss, D. S. & Thornton, J. M. (1993). Procheck - a Program to Check the Stereochemical Quality of Protein Structures. *J. Appl. Crystallogr.* **26**, 283-291.
7. Luthy, R., Bowie, J. U. & Eisenberg, D. (1992). Assessment of Protein Models with 3-Dimensional Profiles. *Nature* **356**, 83-85.
8. Lovell, S. C., Davis, I. W., Adrendall, W. B., de Bakker, P. I. W., Word, J. M., Prisant, M. G., Richardson, J. S. & Richardson, D. C. (2003). Structure validation by C alpha geometry: phi,psi and C beta deviation. *Proteins: Struct., Funct., Genet.* **50**, 437-450.

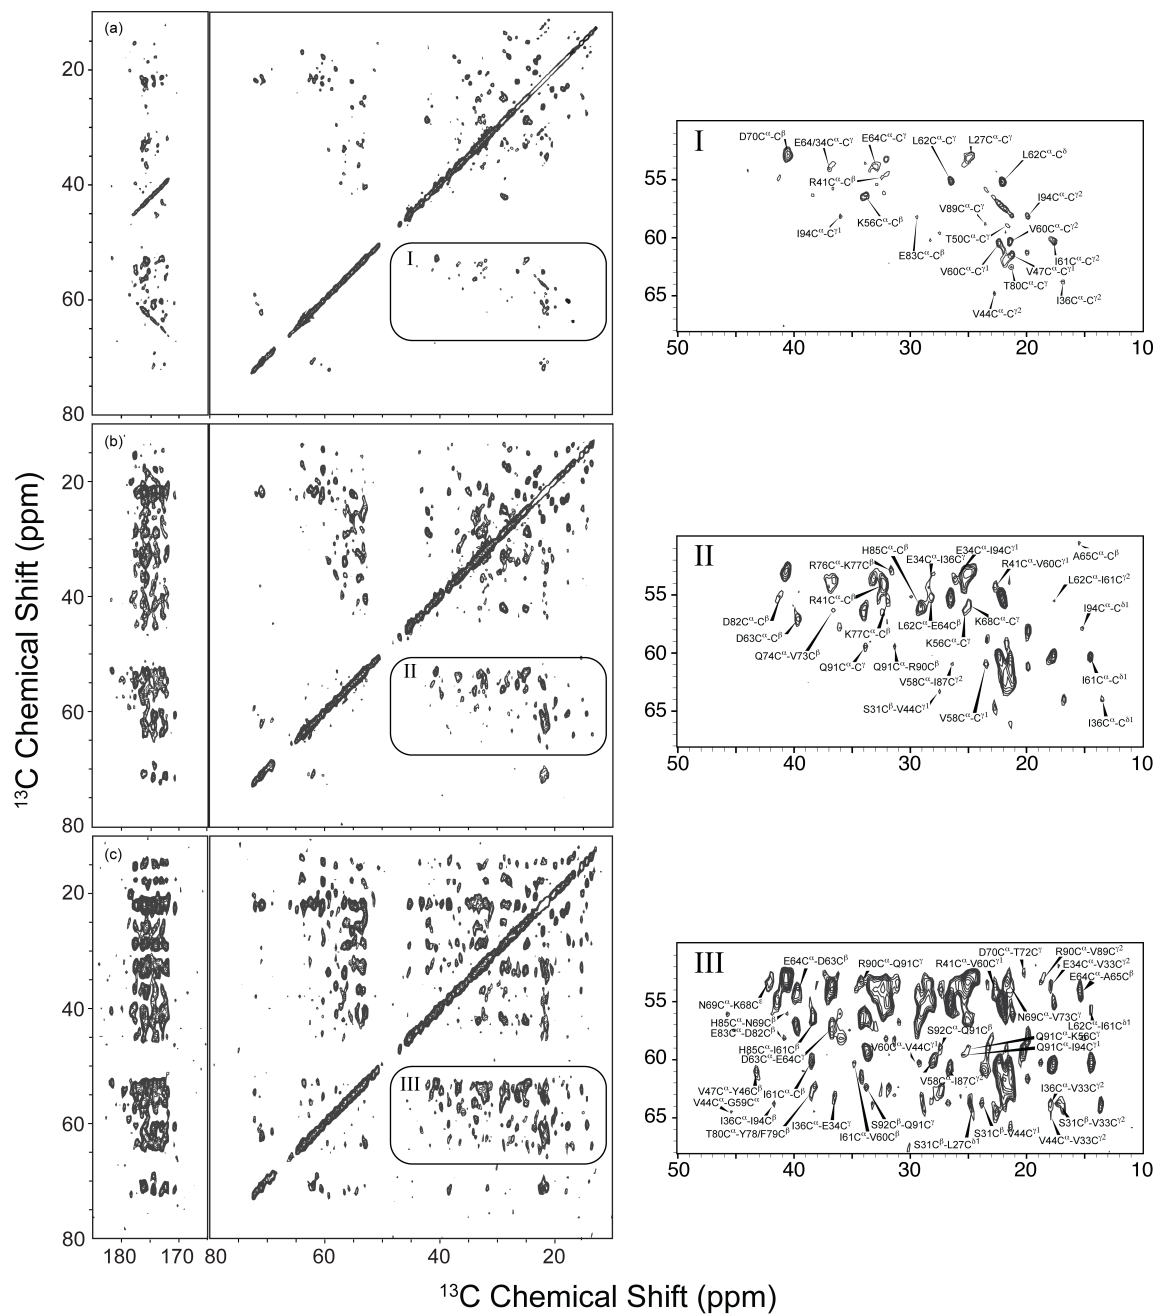

**Supplementary Figure 1.** Left:  $R_2^1$  spectra of 1,3- $^{13}\text{C}$ -glycerol CAP-Gly acquired with the mixing times of a) 50 ms, b) 200 ms, c) 500 ms. Right: The expansions of each spectrum as indicated on the left, showing the resonance assignments. All spectra were acquired at 14.4 T and the MAS frequency of 10 kHz.



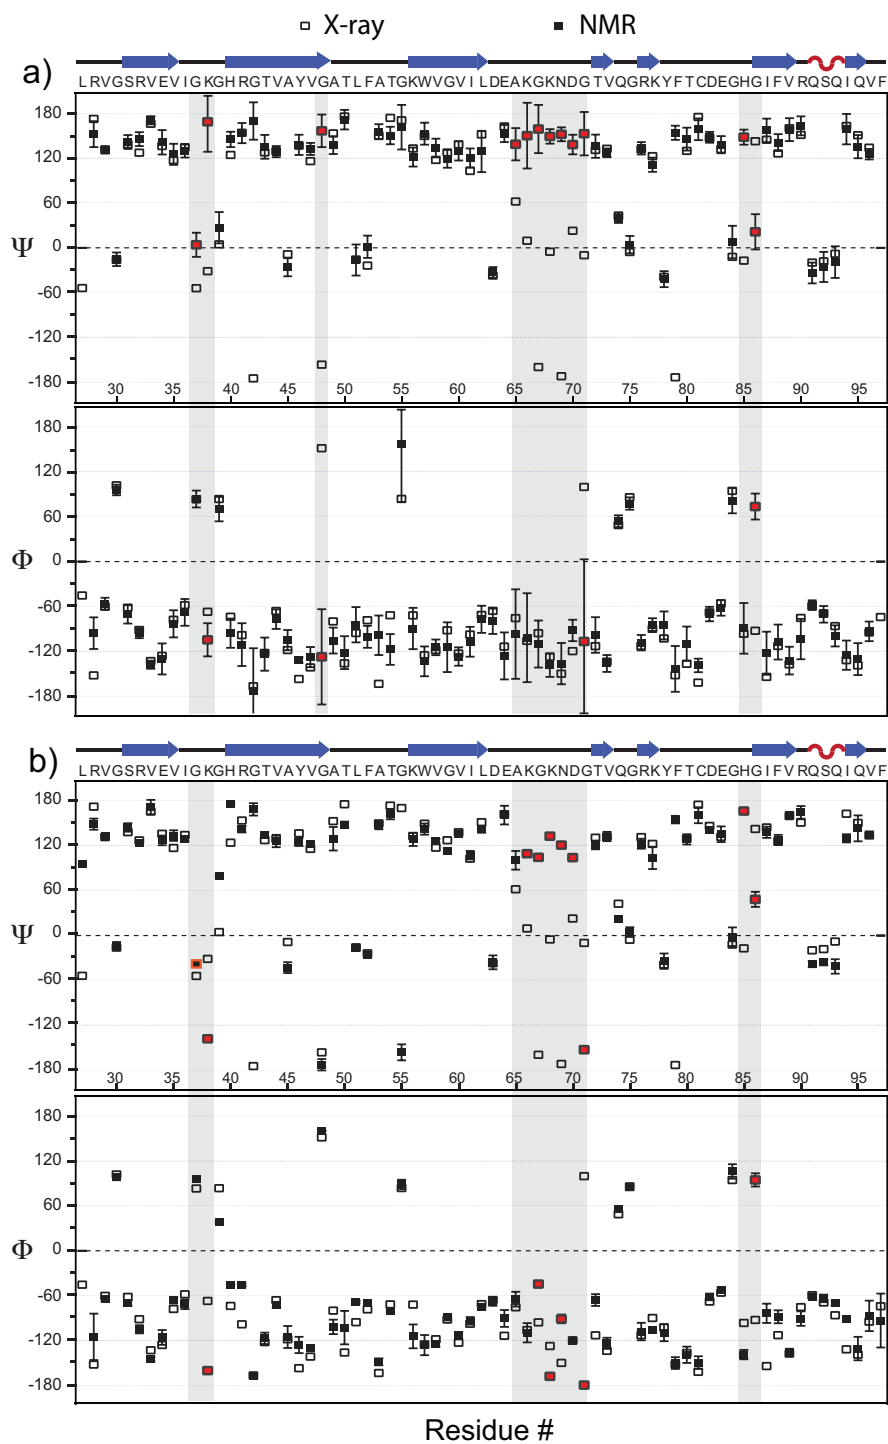

**Supplementary Figure 3.** (a) Backbone torsion angles  $\Psi$  and  $\Phi$  derived by TALOS+, from solid-state chemical shifts of CAP-Gly, filled squares (SSNMR spectra were collected at 19.9 T) (b) Average values of the backbone torsion angles  $\Psi$  and  $\Phi$  extracted from the 10 lowest-energy SSNMR structures (filled squares). The torsion angles of X-ray structure 2HQH are shown for comparison (open squares) in (a) and (b). Residues whose torsion angles are significantly different from the 2HQH X-ray structure values are shown as red filled squares. The  $\Psi$  angle for G37 in the refined SSNMR structure was reported as a violation during the structure refinement. This angle is shown as a black-filled orange square.

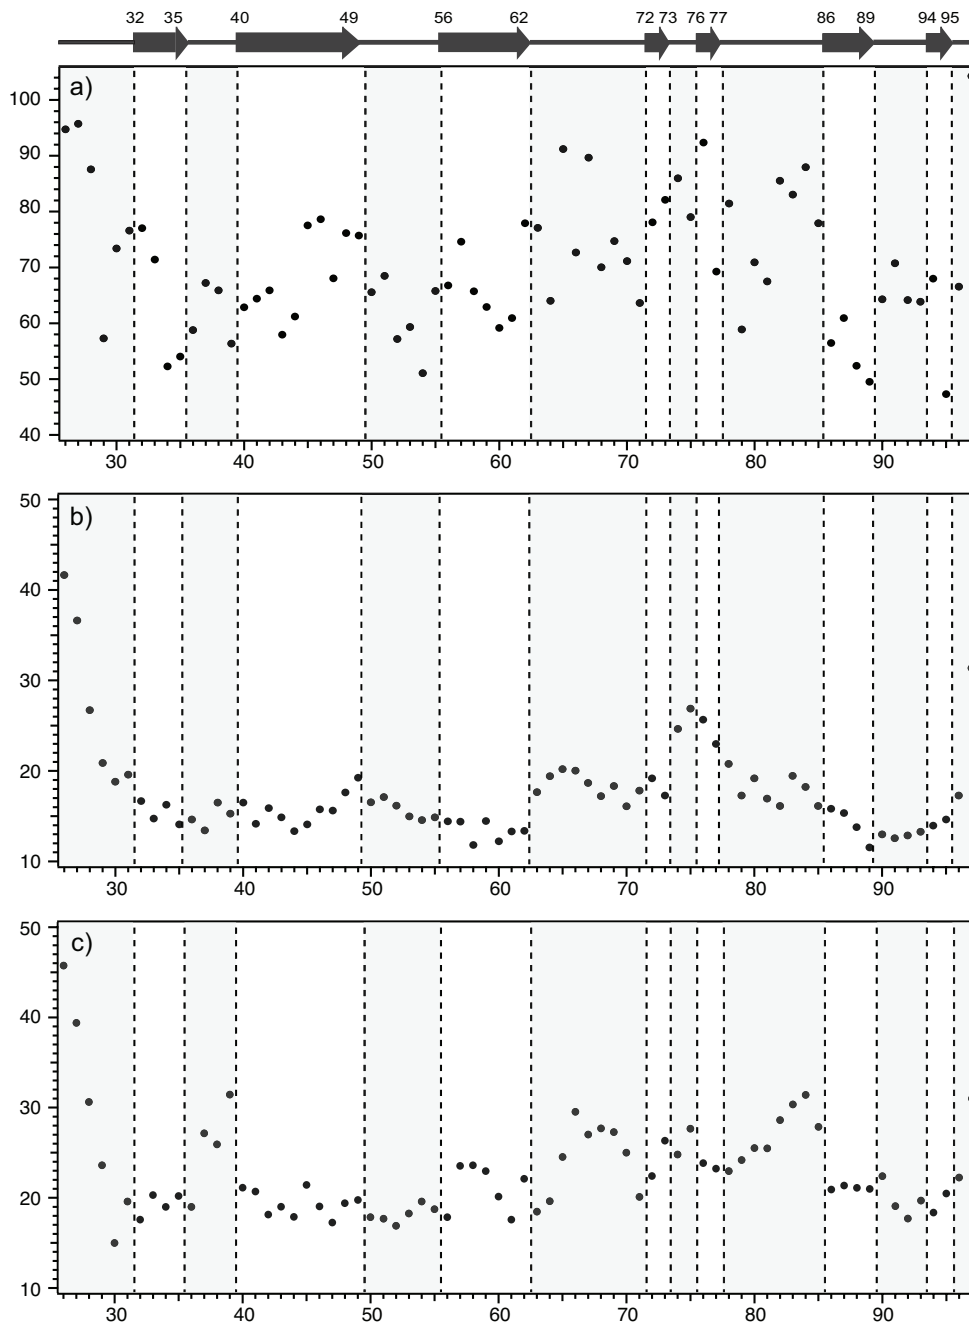

**Supplementary Figure 4.** The crystallographic B-factors for the amide nitrogen atoms plotted for each residue of CAP-Gly, as extracted from the following X-ray structures: 3E2U (a); 2HQH (b); 2HKQ (c).

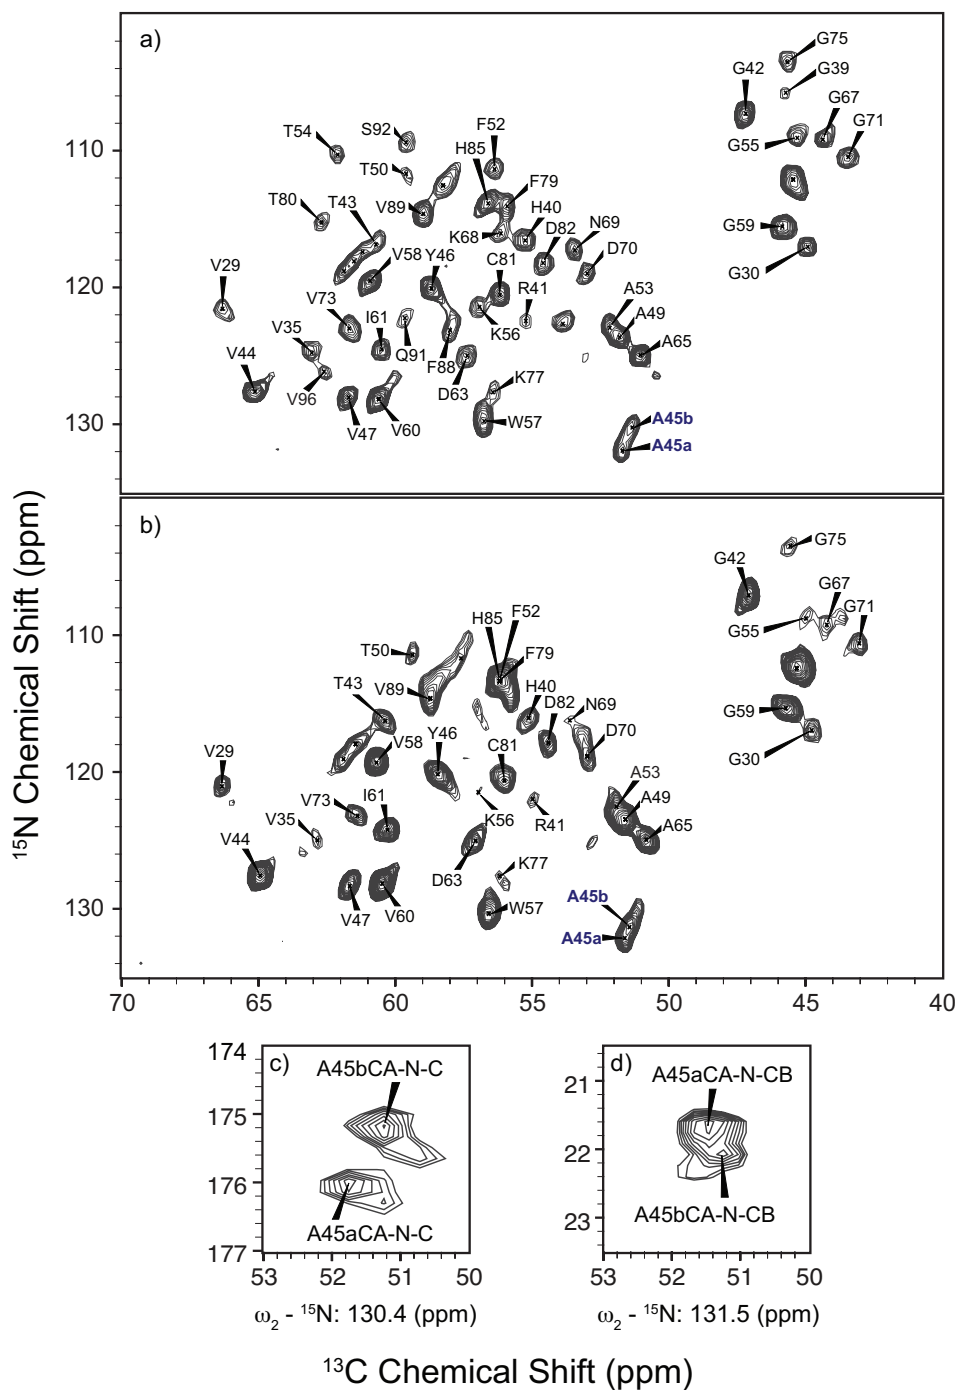

**Supplementary Figure 5. 14.1 T** 2D and 3D MAS NMR spectra showing two conformers of A45: a) a 2D NCA spectrum of [2-<sup>13</sup>C]-glycerol/U-<sup>15</sup>N labeled CAP-Gly, acquired at -2 °C; b) 2D NCA spectrum of [2-<sup>13</sup>C]-glycerol/U-<sup>15</sup>N labeled CAP-Gly, acquired at -20 °C; c) a 2D plane of the 3D NCACX spectrum of U-<sup>13</sup>C,<sup>15</sup>N-labeled CAP-Gly, acquired at -20 °C, and showing the splitting of the peak corresponding to A45; d) a 2D plane of the 3D NCACB spectrum of U-<sup>13</sup>C,<sup>15</sup>N-labeled CAP-Gly, acquired at -20 °C, and showing the splitting of the peak corresponding to A45.



|    |                                                                           |     |      |
|----|---------------------------------------------------------------------------|-----|------|
| 1  | GSSGSSGMAQSKRHVYSRTPSGSRMSAEASARP LRVGSRVEVIGKGRGTVA YVGATL FATGKWWGV I L | 69  | 2COY |
| 15 | GSHMSAEASARP LRVGSRVEVIGKGRGTVA YVGATL FATGKWWGV I L                      | 62  | 2HKQ |
| 15 | GSHMSAEASARP LRVGSRVEVIGKGRGTVA YVGATL FATGKWWGV I L                      | 62  | 3E2U |
| 15 | GSRMSAEASARP LRVGSRVEVIGKGRGTVA YVGATL FATGKWWGV I L                      | 62  | 1TXQ |
| 15 | GSRMSAEASARP LRVGSRVEVIGKGRGTVA YVGATL FATGKWWGV I L                      | 62  | 2HQH |
| 19 | STEASARP LRVGSRVEVIGKGRGTVA YVGATL FATGKWWGV I L                          | 62  | ours |
| 70 | DEAKGKNDGTVQGRKYFTCDEGHGIFV RQSQIQVF EDSPSSG                              | 112 | 2COY |
| 63 | DEAKGKNDGTVQGRKYFTCDEGHGIFV RQSQIQVF EDGADTTSPETPDS                       | 111 | 2HKQ |
| 63 | DEAKGKNDGTVQGRKYFTCDEGHGIFV RQSQIQVF EDGADTTSPETPDS                       | 111 | 3E2U |
| 63 | DEAKGKNDGTVQGRKYFTCDEGHGIFV RQSQIQVF EDGADTTSP                            | 107 | 1TXQ |
| 63 | DEAKGKNDGTVQGRKYFTCDEGHGIFV RQSQIQVF EDGADTTSP                            | 107 | 2HQH |
| 63 | DEAKGKNDGTVQGRKYFTCDEGHGIFV RQSQIQVF EDGADTTSP                            | 107 | ours |

**Supplementary Figure 6.** The amino acid sequences for the various constructs of CAP-Gly used in the structural characterizations by solution NMR and X-ray diffraction. From top to bottom: 2COY (solution NMR, free CAP-Gly); 2HKQ (X-ray, complex of two CAP-Gly molecules with EB1 dimer); 1TXQ (X-ray, complex of two CAP-Gly molecules with EB1 dimer); 3E2U (X-ray, complex of four CAP-Gly molecules with four ZnCLIP molecules); 2HQH (X-ray, complex of four CAP-Gly molecules with four ZnCLIP molecules). The bottom sequence represents the CAP-Gly construct used in our study.

**Table S1.** Summary of the CAP-Gly Structure Calculation Procedure from MAS NMR-Derived Torsion Angle and Distance Restraints

| Calculation Step                    | 1. Pass 1                           | 2. Pass 2                                               | 3. Pass 3                                           | 4. Final Refinement                                 |
|-------------------------------------|-------------------------------------|---------------------------------------------------------|-----------------------------------------------------|-----------------------------------------------------|
| Initial Structure                   | NA                                  | Best output structure from (1)                          | Best output structure from (2)                      | Best output structure from (3)                      |
| Input Distance Restraints           | Ambiguous Distance Restraints Table | Distance Restraints with high possibility by analyze.py | Restraints used in Pass 2 + New assigned restraints | Restraints with high possibility analyzed in Pass 3 |
| Number of Input Distance Restraints | 834                                 | 834                                                     | 924                                                 | 917                                                 |
| Type of NOE Potential               | Soft                                | Hard                                                    | Hard                                                | Hard                                                |
| Input Dihedral Angles               | All from TALOS+                     | All from TALOS+                                         | All from TALOS+                                     | All from TALOS+                                     |
| Input H-bond Restraints             | NA                                  | NA                                                      | NA                                                  | H-bond Restraints from Pass 3                       |
| RMSD within ensemble (Å)            | 2.896 (best 50 out of 500)          | 0.926 (best 50 out of 500)                              | 1.016 (best 50 out of 500)                          | 0.54 (best 10 out of 500)                           |
| RMSD w/X-ray (Å)                    | 2.45                                | 2.02                                                    | 1.82                                                | 1.70                                                |
| CDIH Energy                         | 46.86                               | 11.05                                                   | 9.34                                                | 3.60                                                |
| CDIH RMSD                           | 2.208                               | 1.096                                                   | 1.006                                               | 0.645                                               |



**Table S2.** Solid-state chemical shifts of free CAP-Gly prepared by controlled precipitation from PEG, recorded at the magnetic field of 19.9 T.

| Residue | N      | C $\alpha$ | C $\beta$ | C'     | C $\gamma$ | C $\gamma$ 1 | C $\gamma$ 2 | C $\delta$ | C $\delta$ 1 | C $\delta$ 2 | C $\epsilon$ |
|---------|--------|------------|-----------|--------|------------|--------------|--------------|------------|--------------|--------------|--------------|
| S19     |        |            |           |        |            |              |              |            |              |              |              |
| T20     |        |            |           |        |            |              |              |            |              |              |              |
| E21     |        |            |           |        |            |              |              |            |              |              |              |
| A22     |        |            |           |        |            |              |              |            |              |              |              |
| S23     |        |            |           |        |            |              |              |            |              |              |              |
| A24     |        |            |           |        |            |              |              |            |              |              |              |
| R25     |        |            |           |        |            |              |              |            |              |              |              |
| P26     |        |            |           |        | 27.77      |              |              | 50.89      |              |              |              |
| L27     | 122.69 | 55.47      | 43.51     | 175.81 |            |              |              |            |              |              |              |
| R28     | 122.39 | 54.01      | 31.22     | 175.67 |            |              |              |            |              |              |              |
| V29     | 121.61 | 66.35      | 31.16     | 177.62 |            | 22.95        | 21.62        |            |              |              |              |
| G30     | 117.22 | 45.23      |           | 174.61 |            |              |              |            |              |              |              |
| S31     | 119.06 | 61.84      | 63.83     | 173.27 |            |              |              |            |              |              |              |
| R32     | 125.45 | 53.17      | 29.53     | 176.27 | 28.03      |              |              | 41.27      |              |              |              |
| V33     | 112.33 | 58.11      | 37.80     | 174.33 |            | 23.18        | 18.23        |            |              |              |              |
| E34     | 118.46 | 53.82      | 33.60     | 176.09 |            |              |              |            |              |              |              |
| V35     | 124.99 | 63.16      | 32.06     | 176.18 |            | 22.18        | 21.14        |            |              |              |              |
| I36     | 132.31 | 64.23      | 38.38     | 178.30 |            | 29.15        | 17.12        |            | 14.11        |              |              |
| G37     | 117.58 | 45.66      |           | 174.61 |            |              |              |            |              |              |              |
| K38     | 116.97 | 55.80      | 34.73     | 177.59 |            |              |              |            |              |              |              |
| G39     | 105.71 | 45.82      |           | 173.86 |            |              |              |            |              |              |              |
| H40     | 116.73 | 55.26      | 32.21     | 175.51 | 136.07     |              |              |            |              |              |              |
| R41     | 122.83 | 55.23      | 32.60     | 177.59 | 28.66      |              |              |            |              |              |              |
| G42     | 107.51 | 47.25      |           | 171.07 |            |              |              |            |              |              |              |
| T43 a   | 116.95 | 60.65      | 71.40     | 174.66 |            |              | 22.96        |            |              |              |              |
| T43 b   | 117.30 | 60.99      | 72.14     | 174.68 |            |              | 22.47        |            |              |              |              |
| V44 a   | 127.88 | 65.22      | 31.67     | 176.01 |            | 24.24        | 23.16        |            |              |              |              |
| V44 b   | 127.56 | 65.01      | 31.71     | 174.73 |            | 24.19        | 23.13        |            |              |              |              |
| A45 a   | 131.89 | 51.69      | 22.01     | 176.28 |            |              |              |            |              |              |              |
| A45 b   | 130.60 | 51.56      | 21.97     | 176.38 |            |              |              |            |              |              |              |
| Y46     | 120.22 | 58.72      | 43.41     | 173.21 | 128.65     |              |              |            | 132.25       | 135.11       |              |
| V47     | 128.29 | 61.82      | 35.54     | 174.75 |            | 21.72        | 21.72        |            |              |              |              |
| G48     | 113.20 | 45.39      |           | 172.10 |            |              |              |            |              |              |              |
| A49     | 123.77 | 51.84      | 20.53     | 178.70 |            |              |              |            |              |              |              |
| T50     | 112.42 | 59.60      | 72.52     | 173.50 |            |              | 22.23        |            |              |              |              |
| L51     | 113.03 | 54.73      | 41.83     | 177.80 | 27.62      |              |              |            |              |              |              |
| F52     | 111.44 | 56.37      | 38.73     | 174.56 | 138.03     |              |              |            | 132.35       | 132.35       |              |
| A53     | 123.08 | 52.14      | 22.59     | 176.33 |            |              |              |            |              |              |              |
| T54     | 110.25 | 62.18      | 71.07     | 176.64 |            |              | 22.31        |            |              |              |              |
| G55     | 109.16 | 45.33      |           | 172.50 |            |              |              |            |              |              |              |
| K56     | 121.46 | 57.03      | 33.73     | 176.60 | 25.53      |              |              |            |              |              |              |

|     |        |       |       |        |        |       |        |        |
|-----|--------|-------|-------|--------|--------|-------|--------|--------|
| W57 | 130.11 | 56.86 | 34.23 | 173.96 | 111.89 |       |        | 127.07 |
| V58 | 119.65 | 61.01 | 33.41 | 176.43 |        | 23.75 | 20.82  |        |
| G59 | 115.70 | 45.88 |       | 172.33 |        |       |        |        |
| V60 | 128.40 | 60.72 | 35.12 | 173.36 |        | 22.69 | 21.68  |        |
| I61 | 124.69 | 60.63 | 38.88 | 177.79 |        | 28.36 | 17.95  | 14.77  |
| L62 | 133.06 | 55.61 | 41.67 | 177.92 | 26.93  |       |        | 22.39  |
| D63 | 125.11 | 57.44 | 40.08 | 177.87 | 180.07 |       |        |        |
| E64 | 118.09 | 54.38 | 32.96 | 176.81 | 37.16  |       | 179.98 |        |
| A65 | 125.05 | 51.11 | 15.75 | 178.01 |        |       |        |        |
| K66 | 122.67 | 53.79 | 33.38 | 176.33 | 25.47  |       |        |        |
| G67 | 109.20 | 44.41 |       | 172.93 |        |       |        |        |
| K68 | 116.29 | 56.19 | 37.24 | 175.84 | 25.34  |       | 29.10  | 42.46  |
| N69 | 117.30 | 53.43 | 40.82 | 173.42 |        |       |        |        |
| D70 | 119.00 | 53.13 | 41.00 | 178.13 | 182.03 |       |        |        |
| G71 | 110.99 | 43.47 |       | 174.38 |        |       |        |        |
| T72 | 118.00 | 61.61 | 69.35 | 174.69 |        |       | 20.22  |        |
| V73 | 123.29 | 61.71 | 36.43 | 176.84 |        | 22.20 | 21.52  |        |
| Q74 | 130.21 | 56.88 | 26.98 | 176.11 | 34.39  |       |        | 176.31 |
| G75 | 103.65 | 45.72 |       | 173.01 |        |       |        |        |
| R76 | 122.07 | 53.84 | 30.63 | 172.85 |        |       |        |        |
| K77 | 128.26 | 56.55 | 32.72 | 176.04 | 24.45  |       | 29.48  |        |
| Y78 | 127.69 | 60.53 | 39.42 | 175.16 |        |       |        |        |
| F79 | 114.21 | 56.04 | 38.79 | 172.50 |        |       |        |        |
| T80 | 115.34 | 62.82 | 71.34 | 172.78 |        |       | 21.53  |        |
| C81 | 120.70 | 56.21 | 32.33 | 172.33 |        |       |        |        |
| D82 | 118.44 | 54.71 | 41.31 | 176.72 |        |       |        |        |
| E83 | 121.23 | 58.43 | 29.94 | 177.91 | 36.05  |       | 183.77 |        |
| G84 | 112.19 | 45.51 |       | 174.55 |        |       |        |        |
| H85 | 113.93 | 56.66 | 29.48 | 174.19 | 132.53 |       |        |        |
| G86 | 112.30 | 45.66 |       | 174.58 |        |       |        |        |
| I87 | 118.46 | 60.61 | 43.82 | 172.70 |        | 27.21 | 19.17  | 14.80  |
| F88 | 122.47 | 58.04 | 42.31 | 175.78 |        |       |        |        |
| V89 | 114.84 | 59.08 | 37.05 | 175.69 |        | 23.66 | 19.04  |        |
| R90 | 117.65 | 53.42 | 31.66 | 179.07 | 25.51  |       |        | 42.25  |
| Q91 | 122.57 | 59.72 | 28.07 | 176.70 | 34.04  |       |        | 179.18 |
| S92 | 109.71 | 59.66 | 62.87 | 175.94 |        |       |        |        |
| Q93 | 117.98 | 56.76 | 31.42 | 176.09 | 36.65  |       |        |        |
| I94 | 112.97 | 58.43 | 43.63 | 173.85 |        | 25.02 | 20.18  |        |
| Q95 | 118.57 | 53.80 | 33.62 | 175.00 |        |       |        |        |
| V96 | 126.73 | 63.04 | 32.58 | 176.00 |        | 21.18 |        |        |
| F97 | 124.97 | 57.36 | 40.08 |        |        |       |        |        |

**Table S3.** Solid-state chemical shifts of CAP-Gly in complex with EB1 prepared by controlled precipitation from PEG, recorded at the magnetic field of 19.9 T.

| Residue | N      | C $\alpha$ | C $\beta$ | C'     | C $\gamma$ | C $\gamma$ 1 | C $\gamma$ 2 | C $\delta$ | C $\delta$ 1 | C $\delta$ 2 | C $\epsilon$ |
|---------|--------|------------|-----------|--------|------------|--------------|--------------|------------|--------------|--------------|--------------|
| S19     |        |            |           |        |            |              |              |            |              |              |              |
| T20     |        |            |           |        |            |              |              |            |              |              |              |
| E21     |        |            |           |        |            |              |              |            |              |              |              |
| A22     |        |            |           |        |            |              |              |            |              |              |              |
| S23     |        |            |           |        |            |              |              |            |              |              |              |
| A24     |        |            |           |        |            |              |              |            |              |              |              |
| R25     |        |            |           |        |            |              |              |            |              |              |              |
| P26     |        |            |           |        |            |              |              |            |              |              |              |
| L27     |        |            |           |        |            |              |              |            |              |              |              |
| R28     |        |            |           |        |            |              |              |            |              |              |              |
| V29     | 121.54 | 65.67      | 31.57     | 177.00 |            | 22.66        | 20.74        |            |              |              |              |
| G30     | 115.29 | 45.31      |           | 174.26 |            |              |              |            |              |              |              |
| S31     | 117.56 | 61.27      | 63.97     | 173.35 |            |              |              |            |              |              |              |
| R32     | 124.91 | 52.97      | 28.81     | 176.68 | 25.09      |              |              | 40.86      |              |              |              |
| V33     | 113.02 | 58.13      | 37.68     | 174.32 |            | 23.39        | 17.95        |            |              |              |              |
| E34     | 118.16 | 54.01      |           |        |            |              |              |            |              |              |              |
| V35     | 124.44 | 62.79      | 32.49     | 176.76 |            | 21.97        | 21.13        |            |              |              |              |
| I36     | 131.85 | 63.97      | 38.47     | 177.55 |            | 28.94        | 17.23        |            | 13.91        |              |              |
| G37     | 118.07 |            |           |        |            |              |              |            |              |              |              |
| K38     |        |            |           |        |            |              |              |            |              |              |              |
| G39     | 104.59 | 46.39      |           | 173.87 |            |              |              |            |              |              |              |
| H40     | 116.89 | 55.58      | 31.58     | 175.63 |            |              |              |            |              |              |              |
| R41     | 123.03 | 55.47      | 32.46     | 178.16 | 29.01      |              |              | 43.96      |              |              |              |
| G42     | 107.30 | 47.34      |           | 170.84 |            |              |              |            |              |              |              |
| T43     | 117.53 | 61.04      | 71.95     | 174.39 |            |              | 22.18        |            |              |              |              |
| V44     | 128.15 | 65.46      | 31.61     | 174.48 |            | 24.56        | 22.72        |            |              |              |              |
| A45     | 130.49 | 51.32      | 22.42     | 176.62 |            |              |              |            |              |              |              |
| Y46     | 119.76 | 58.28      | 43.35     | 173.39 |            |              |              |            |              |              |              |
| V47     | 129.88 | 61.95      | 35.31     | 175.53 |            | 21.77        | 21.77        |            |              |              |              |
| G48     | 114.87 | 45.58      |           | 173.37 |            |              |              |            |              |              |              |
| A49     | 127.08 | 52.35      | 19.99     | 178.47 |            |              |              |            |              |              |              |
| T50     | 113.08 | 59.87      | 72.37     | 171.95 |            |              | 22.05        |            |              |              |              |
| L51     | 111.60 | 55.10      | 43.56     | 178.76 | 27.37      |              |              |            | 26.78        | 24.69        |              |
| F52     | 111.31 | 57.02      | 38.19     | 174.33 |            |              |              |            |              |              |              |
| A53     | 122.57 | 52.03      | 22.03     | 176.54 |            |              |              |            |              |              |              |
| T54     | 108.75 | 62.13      | 71.83     | 177.03 |            |              | 22.69        |            |              |              |              |
| G55     | 108.57 | 45.32      |           | 171.87 |            |              |              |            |              |              |              |
| K56     | 121.29 | 57.29      | 33.34     | 176.09 | 25.71      |              |              | 29.77      |              |              | 42.33        |
| W57     | 130.68 | 57.05      | 34.04     | 174.11 |            |              |              |            | 127.18       | 127.18       | 127.18       |
| V58     | 119.58 | 61.45      | 33.50     | 176.22 |            | 23.18        | 20.80        |            |              |              |              |
| G59     | 115.40 | 45.49      |           | 172.59 |            |              |              |            |              |              |              |

|     |        |       |       |        |        |       |       |        |        |        |
|-----|--------|-------|-------|--------|--------|-------|-------|--------|--------|--------|
| V60 | 128.07 | 60.72 | 35.42 | 174.16 |        | 22.23 | 22.23 |        |        |        |
| I61 | 124.04 | 60.73 | 39.01 | 177.45 |        | 28.73 | 18.00 | 14.86  |        |        |
| L62 | 133.72 | 55.38 | 41.73 | 178.08 | 27.04  |       |       | 22.42  | 22.42  |        |
| D63 | 125.41 | 57.36 | 39.93 | 177.86 | 179.84 |       |       |        |        |        |
| E64 | 117.84 | 54.41 | 33.40 | 176.97 | 37.56  |       |       | 184.41 |        |        |
| A65 | 124.98 | 50.99 | 15.69 | 178.06 |        |       |       |        |        |        |
| K66 | 122.69 | 53.51 | 33.17 | 176.44 | 25.24  |       |       | 28.52  |        | 42.52  |
| G67 | 109.39 | 44.06 |       | 173.13 |        |       |       |        |        |        |
| K68 | 117.18 | 56.83 | 36.84 | 175.98 | 25.46  |       |       | 29.00  |        | 41.94  |
| N69 | 117.98 | 54.05 | 40.99 | 173.21 | 175.52 |       |       |        |        |        |
| D70 | 119.49 | 52.90 | 40.83 | 178.65 | 182.07 |       |       |        |        |        |
| G71 | 112.62 | 44.24 |       | 174.63 |        |       |       |        |        |        |
| T72 | 117.98 | 61.49 | 69.23 | 174.68 |        |       | 19.94 |        |        |        |
| V73 | 123.47 | 61.61 | 36.51 | 176.72 |        | 22.44 | 21.67 |        |        |        |
| Q74 | 130.01 | 56.83 | 26.68 | 176.09 | 34.11  |       |       | 180.72 |        |        |
| G75 | 103.65 | 45.56 |       | 173.55 |        |       |       |        |        |        |
| R76 | 122.12 | 54.56 | 31.41 | 172.58 | 28.62  |       |       | 42.90  |        |        |
| K77 | 128.35 | 56.35 | 32.23 | 175.81 | 24.49  |       |       | 29.40  |        | 41.62  |
| Y78 | 128.97 | 61.21 | 39.65 | 175.72 | 130.83 |       |       |        | 133.78 | 133.78 |
| F79 | 114.12 | 56.04 | 38.94 | 172.78 | 138.16 |       |       |        | 131.13 | 131.13 |
| T80 | 115.63 | 63.06 | 71.09 | 172.97 |        |       | 21.69 |        |        |        |
| C81 | 121.30 | 56.27 | 31.93 | 172.03 |        |       |       |        |        |        |
| D82 | 118.32 | 54.53 | 41.40 | 176.88 | 180.15 |       |       |        |        |        |
| E83 | 121.20 | 58.61 | 29.97 | 177.90 | 36.03  |       |       |        |        |        |
| G84 | 112.95 | 45.42 |       | 174.47 |        |       |       |        |        |        |
| H85 | 114.46 | 56.71 | 29.17 | 173.99 | 132.17 |       |       |        |        | 121.95 |
| G86 | 112.45 | 45.11 |       | 174.50 |        |       |       |        |        |        |
| I87 | 121.61 | 60.96 | 43.93 | 171.25 |        | 28.84 | 15.94 | 14.72  |        |        |
| F88 | 126.83 | 57.44 | 42.52 | 175.55 |        |       |       |        |        |        |
| V89 | 112.15 | 58.85 | 37.05 | 175.92 |        | 23.51 | 18.74 |        |        |        |
| R90 | 118.04 | 53.66 | 31.50 | 178.96 | 25.72  |       |       | 42.20  |        |        |
| Q91 | 122.03 | 59.52 | 27.96 | 176.93 | 33.79  |       |       | 179.55 |        |        |
| S92 | 110.84 | 59.73 | 62.74 | 175.86 |        |       |       |        |        |        |
| Q93 | 119.28 | 55.94 | 30.37 | 175.18 | 35.42  |       |       |        |        |        |
| I94 | 114.73 | 58.09 | 41.66 | 174.94 |        | 25.79 | 19.48 |        |        |        |
| Q95 |        |       |       |        |        |       |       |        |        |        |
| V96 |        |       | 32.96 |        |        | 21.57 |       |        |        |        |
| F97 |        |       |       |        |        |       |       |        |        |        |

**Table S4.** Summary of the MAS NMR CAP-Gly structure quality validation.

|                                                               |                         |
|---------------------------------------------------------------|-------------------------|
| <b>Ramachandran Plot Summary by Procheck-NMR <sup>1</sup></b> |                         |
| Most favored regions                                          | 86.5%                   |
| Additionally allowed regions                                  | 12.3%                   |
| Generously allowed regions                                    | 1.2%                    |
| Disallowed regions                                            | 0.0%                    |
| <b>Equivalent Resolution by Procheck-NMR <sup>1</sup></b>     |                         |
| Percentage of residues in A, B, L                             | 1.7 Å                   |
| H-bond energy standard deviation                              | 1.9 Å                   |
| Chi-1 pooled standard deviation                               | 1.3 Å                   |
| Chi-2 trans standard deviation                                | 1.0 Å                   |
| <b>Structure Z-scores by Whatif <sup>2,3</sup></b>            |                         |
|                                                               | <b>Average Z-scores</b> |
| Coarse packing quality control                                | -2.44                   |
| Anomalous bond lengths                                        | 0.464                   |
| Planarity                                                     | Normal                  |
| Hand check (Improper dihedral RMS Z-score)                    | 0.745                   |
| Ramachandran plot evaluation                                  | -1.144                  |
| Anomalous bond angles                                         | 0.825                   |
| <b>Equivalent Resolution by ResProx<sup>4</sup></b>           |                         |
| Mean for the ensemble                                         | 2.411 Å                 |
| Standard Deviation                                            | 0.211 Å                 |
| <b>Global Quality Scores by PSVS<sup>5</sup></b>              |                         |
|                                                               | <b>Z-score</b>          |
| Procheck <sup>6</sup> G-factor (phi/psi only)                 | -2.20                   |
| Procheck <sup>6</sup> G-factor (all dihedral angles)          | -2.96                   |
| Verify3D <sup>7</sup>                                         | -1.61                   |
| MolProbity <sup>8</sup> clash score                           | -2.77                   |

Table S5. TALOS+ Determined Secondary Structure for Free CAP-Gly and CAP-Gly in Complex with EB1.\*

|       | CAP-Gly              |                       |                     |                             | CAP-Gly in Complex with EB1 |                       |                     |                             |
|-------|----------------------|-----------------------|---------------------|-----------------------------|-----------------------------|-----------------------|---------------------|-----------------------------|
|       | Possibility of Helix | Possibility of Strand | Possibility of Coil | Secondary Structure Context | Possibility of Helix        | Possibility of Strand | Possibility of Coil | Secondary Structure Context |
| L27   | 0.333                | 0.333                 | 0.333               | L                           | NA                          | NA                    | NA                  | NA                          |
| R28   | 0.013                | 0.14                  | 0.847               | L                           | 0.333                       | 0.333                 | 0.333               | L                           |
| V29   | 0.029                | 0.058                 | 0.913               | L                           | 0.054                       | 0.08                  | 0.866               | L                           |
| G30   | 0.048                | 0.035                 | 0.917               | L                           | 0.052                       | 0.029                 | 0.919               | L                           |
| S31   | 0.013                | 0.077                 | 0.91                | L                           | 0.019                       | 0.076                 | 0.906               | L                           |
| R32   | 0                    | 0.623                 | 0.377               | E                           | 0                           | 0.499                 | 0.501               | L                           |
| V33   | 0.005                | 0.893                 | 0.102               | E                           | 0                           | 0.755                 | 0.245               | E                           |
| E34   | 0.003                | 0.946                 | 0.051               | E                           | 0.002                       | 0.902                 | 0.096               | E                           |
| V35   | 0                    | 0.852                 | 0.148               | E                           | 0                           | 0.814                 | 0.186               | E                           |
| I36   | 0.004                | 0.281                 | 0.716               | L                           | 0.004                       | 0.714                 | 0.282               | E                           |
| G37   | 0                    | 0.113                 | 0.887               | L                           | NA                          | NA                    | NA                  | NA                          |
| K38   | 0.011                | 0.061                 | 0.928               | L                           | NA                          | NA                    | NA                  | NA                          |
| G39   | 0.016                | 0.034                 | 0.95                | L                           | 0.02                        | 0.043                 | 0.937               | L                           |
| H40   | 0.016                | 0.111                 | 0.873               | L                           | 0.027                       | 0.111                 | 0.862               | L                           |
| R41   | 0.001                | 0.44                  | 0.56                | L                           | 0.004                       | 0.312                 | 0.684               | L                           |
| G42   | 0.007                | 0.776                 | 0.217               | E                           | 0.005                       | 0.703                 | 0.292               | E                           |
| T43 a | 0                    | 0.854                 | 0.146               | E                           | 0                           | 0.855                 | 0.145               | E                           |
| V44 a | 0                    | 0.867                 | 0.133               | E                           | 0                           | 0.877                 | 0.123               | E                           |
| A45 a | 0                    | 0.924                 | 0.076               | E                           | 0                           | 0.937                 | 0.063               | E                           |
| Y46   | 0                    | 0.951                 | 0.049               | E                           | 0                           | 0.96                  | 0.04                | E                           |
| V47   | 0                    | 0.927                 | 0.073               | E                           | 0                           | 0.944                 | 0.056               | E                           |
| G48   | 0                    | 0.841                 | 0.159               | E                           | 0                           | 0.808                 | 0.192               | E                           |
| A49   | 0                    | 0.741                 | 0.259               | E                           | 0                           | 0.541                 | 0.459               | E                           |
| T50   | 0.009                | 0.305                 | 0.686               | L                           | 0                           | 0.407                 | 0.593               | L                           |
| L51   | 0.007                | 0.107                 | 0.885               | L                           | 0.001                       | 0.176                 | 0.823               | L                           |
| F52   | 0.021                | 0.198                 | 0.782               | L                           | 0.051                       | 0.17                  | 0.779               | L                           |
| A53   | 0                    | 0.256                 | 0.744               | L                           | 0.012                       | 0.138                 | 0.85                | L                           |
| T54   | 0.001                | 0.187                 | 0.812               | L                           | 0                           | 0.291                 | 0.709               | L                           |
| G55   | 0                    | 0.168                 | 0.832               | L                           | 0                           | 0.668                 | 0.332               | E                           |
| K56   | 0.003                | 0.548                 | 0.45                | E                           | 0.003                       | 0.847                 | 0.15                | E                           |
| W57   | 0                    | 0.908                 | 0.092               | E                           | 0                           | 0.929                 | 0.071               | E                           |

|     |       |       |       |   |       |       |       |   |
|-----|-------|-------|-------|---|-------|-------|-------|---|
| V58 | 0     | 0.949 | 0.051 | E | 0     | 0.939 | 0.061 | E |
| G59 | 0     | 0.943 | 0.057 | E | 0     | 0.937 | 0.063 | E |
| V60 | 0     | 0.957 | 0.043 | E | 0     | 0.956 | 0.044 | E |
| I61 | 0     | 0.902 | 0.098 | E | 0     | 0.899 | 0.101 | E |
| L62 | 0.051 | 0.267 | 0.682 | L | 0.034 | 0.283 | 0.684 | L |
| D63 | 0.047 | 0.068 | 0.884 | L | 0.036 | 0.077 | 0.888 | L |
| E64 | 0.03  | 0.053 | 0.918 | L | 0.026 | 0.057 | 0.917 | L |
| A65 | 0.007 | 0.079 | 0.915 | L | 0.006 | 0.082 | 0.912 | L |
| K66 | 0     | 0.342 | 0.658 | L | 0     | 0.236 | 0.764 | L |
| G67 | 0     | 0.87  | 0.13  | E | 0     | 0.614 | 0.386 | E |
| K68 | 0.004 | 0.758 | 0.239 | E | 0.003 | 0.576 | 0.421 | E |
| N69 | 0.013 | 0.19  | 0.797 | L | 0.017 | 0.152 | 0.831 | L |
| D70 | 0.008 | 0.065 | 0.926 | L | 0.01  | 0.057 | 0.933 | L |
| G71 | 0     | 0.11  | 0.89  | L | 0     | 0.1   | 0.9   | L |
| T72 | 0     | 0.535 | 0.465 | E | 0     | 0.479 | 0.521 | L |
| V73 | 0     | 0.727 | 0.273 | E | 0     | 0.718 | 0.282 | E |
| Q74 | 0.015 | 0.194 | 0.791 | L | 0.016 | 0.182 | 0.802 | L |
| G75 | 0.004 | 0.068 | 0.928 | L | 0.003 | 0.065 | 0.931 | L |
| R76 | 0     | 0.166 | 0.834 | L | 0     | 0.154 | 0.846 | L |
| K77 | 0     | 0.42  | 0.58  | L | 0     | 0.388 | 0.612 | L |
| Y78 | 0.006 | 0.492 | 0.501 | L | 0.008 | 0.542 | 0.45  | E |
| F79 | 0.01  | 0.754 | 0.236 | E | 0.01  | 0.766 | 0.224 | E |
| T80 | 0     | 0.925 | 0.075 | E | 0     | 0.911 | 0.089 | E |
| C81 | 0     | 0.711 | 0.289 | E | 0     | 0.64  | 0.359 | E |
| D82 | 0.01  | 0.196 | 0.794 | L | 0.01  | 0.179 | 0.811 | L |
| E83 | 0.074 | 0.048 | 0.878 | L | 0.074 | 0.048 | 0.877 | L |
| G84 | 0.046 | 0.016 | 0.938 | L | 0.045 | 0.015 | 0.939 | L |
| H85 | 0.011 | 0.044 | 0.945 | L | 0.001 | 0.08  | 0.919 | L |
| G86 | 0     | 0.242 | 0.758 | L | 0     | 0.557 | 0.443 | E |
| I87 | 0     | 0.833 | 0.167 | E | 0.001 | 0.884 | 0.114 | E |
| F88 | 0     | 0.965 | 0.035 | E | 0     | 0.972 | 0.028 | E |
| V89 | 0     | 0.771 | 0.229 | E | 0     | 0.823 | 0.177 | E |
| R90 | 0.027 | 0.157 | 0.816 | L | 0.031 | 0.168 | 0.801 | L |
| Q91 | 0.431 | 0     | 0.569 | L | 0.55  | 0.005 | 0.445 | H |
| S92 | 0.653 | 0.001 | 0.346 | H | 0.662 | 0     | 0.338 | H |
| Q93 | 0.302 | 0.15  | 0.548 | L | 0.279 | 0.041 | 0.679 | L |

|     |       |       |       |   |       |       |       |    |
|-----|-------|-------|-------|---|-------|-------|-------|----|
| I94 | 0.025 | 0.751 | 0.224 | E | 0.036 | 0.307 | 0.657 | L  |
| Q95 | 0.003 | 0.933 | 0.064 | E | NA    | NA    | NA    | NA |
| V96 | 0     | 0.897 | 0.103 | E |       |       |       |    |
| F97 | 0.333 | 0.333 | 0.333 | L |       |       |       |    |

---

\* H- helix, E- strand, C- coil
